# Supplementary material
Source: PubMed Central journal article supplement (PMC3919513)
Supplement: NIHMS542723-supplement-01.pdf [file NIHMS542723-supplement-01.pdf]

Supplemental Table 1

|             |          |                                                          |
|-------------|----------|----------------------------------------------------------|
| rs112561475 | A allele | GAAGGTGACCAAGTTCATGCTGGTACTGGAACCAGGTGAGGTT              |
|             | G allele | GAAGGTCTGGAGTCAACGGATTGTAAGTACTGGAACCAGGTGAGGTC          |
|             | Common   | ATGCGCCACAAAGGAGCCAAACAT                                 |
| rs4694358   | C allele | GAAGGTGACCAAGTTCATGCTGCATCACAATATTTATTGCTGGAA<br>TCAG    |
|             | T allele | GAAGGTCTGGAGTCAACGGATTGCATCACAATATTTATTGCTGGAA<br>TCAA   |
|             | Common   | GAGATTTGAAGCTGGAAAACCTGATAGAT                            |
| rs61750900  | G allele | GAAGGTGACCAAGTTCATGCTAACTTCAAGTTTAAGAGTGGATGA<br>GTC     |
|             | T allele | GAAGGTCTGGAGTCAACGGATTATAAACTTCAAGTTTAAGAGTGG<br>ATGAGTA |
|             | Common   | CTGTAAGTGGCATCTTCAGCTTCCAT                               |
| rs61749966  | C allele | GAAGGTGACCAAGTTCATGCTGCAGAATACAGCCTTTGGATGAAC            |
|             | T allele | GAAGGTCTGGAGTCAACGGATTTCGCAGAATACAGCCTTTGGATGA<br>AT     |
|             | Common   | CACCTCATGACCTCTCTGAACAAGTT                               |
